# Supplementary material for: Calcineurin complex isolated from T-cell acute lymphoblastic leukemia (T-ALL) cells identifies new signaling pathways including mTOR/AKT/S6K whose inhibition synergize with calcineurin inhibition to promote T-ALL cell death
Source: PubMed Central journal article supplement (PMC5216755; doi:10.18632/oncotarget.9933), 2016-06-10
Supplement: oncotarget-07-45715-s001.pdf [file oncotarget-07-45715-s001.pdf]

# Calcineurin complex isolated from T-cell acute lymphoblastic leukemia (T-ALL) cells identifies new signaling pathways including mTOR/AKT/S6K whose inhibition synergize with calcineurin inhibition to promote T-ALL cell death

## SUPPLEMENTARY FIGURES AND TABLES

A

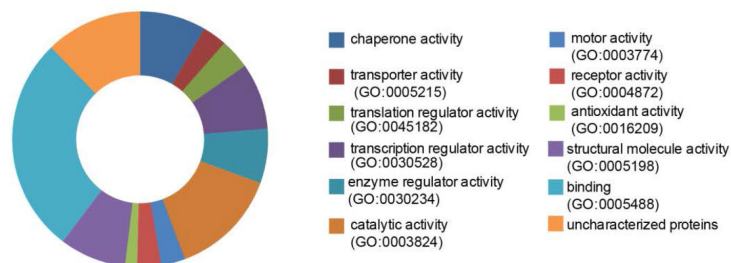

B

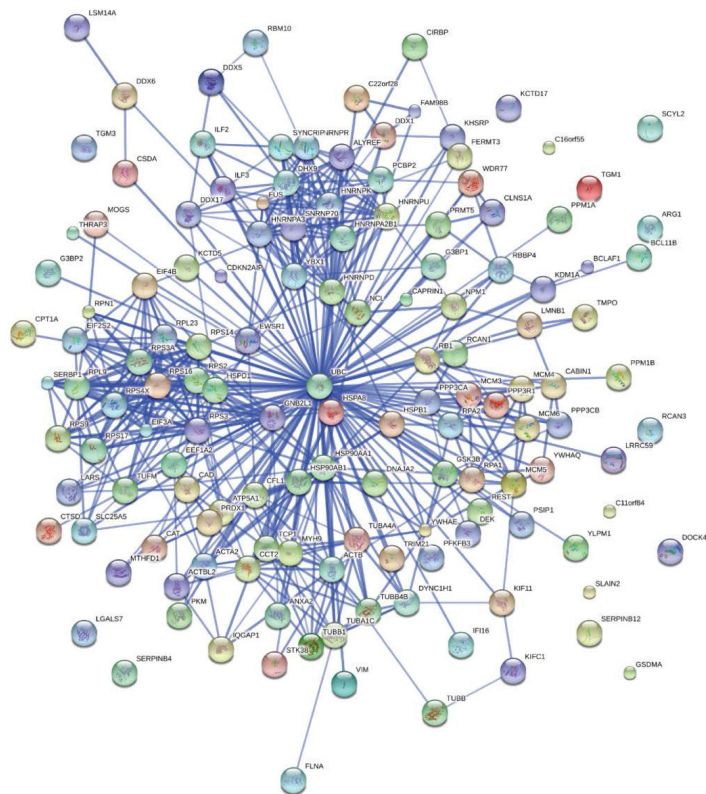

**Supplementary Figure S1: Functional classification of PPP3CA-associated proteins.** A. Functional classification of PPP3CA-associated proteins identified by mass spectrometry according to PANTHER software. B. STRING software was used to determine connections between PPP3CA-associated proteins (Confidence view) identified by mass spectrometry. Stronger associations are represented by thicker lines (high confidence associations are shown).

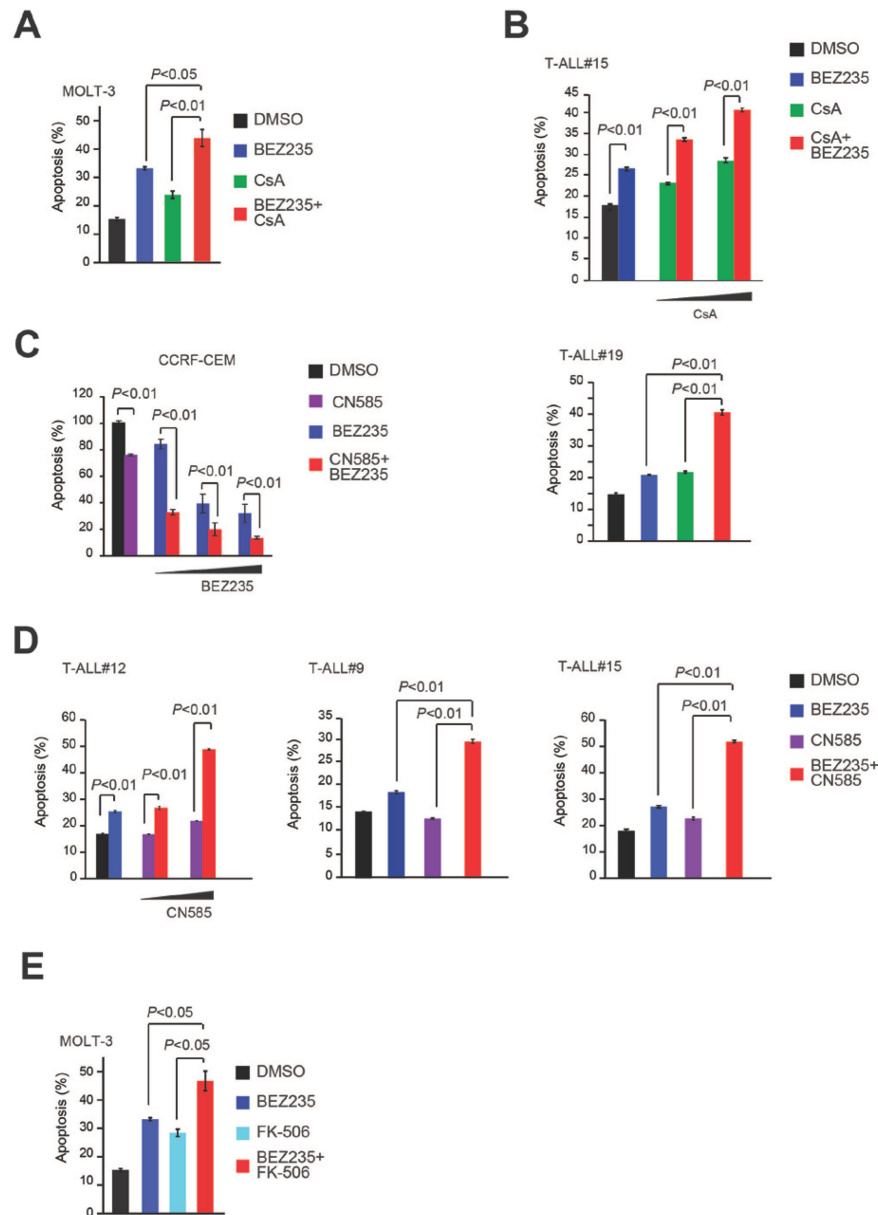

**Supplementary Figure S2: Joint pharmacologic inhibition of Cn and PI3K-mTOR enhances the anti-leukemic effects of each single drug.**

**A.** Apoptosis quantification in MOLT-3 T-ALL cells treated *in vitro* with vehicle only, CsA (10  $\mu\text{g}/\text{mL}$ ), BEZ235 (50 nM) or BEZ235 plus CsA (BEZ235 + CsA; 50 nM and 10  $\mu\text{g}/\text{mL}$ , respectively). Error bars represent  $\pm$  SD of triplicate experiments. **(B, top panel)** Cell viability quantification in T-ALL#15 xenograft cells treated *in vitro* with vehicle only, CsA (10 or 15  $\mu\text{g}/\text{mL}$ ), BEZ235 (2  $\mu\text{M}$ ) or BEZ235 plus CsA (BEZ235 + CsA; 2  $\mu\text{M}$  and 10 or 15  $\mu\text{g}/\text{mL}$ , respectively). Error bars represent  $\pm$  SD of triplicate experiments. **(B, bottom panel)** Cell viability quantification in T-ALL#19 xenograft cells treated *in vitro* with vehicle only, CsA (10  $\mu\text{g}/\text{mL}$ ), BEZ235 (2  $\mu\text{M}$ ) or BEZ235 plus CsA (BEZ235 + CsA; 2  $\mu\text{M}$  and 10  $\mu\text{g}/\text{mL}$ , respectively). Error bars represent  $\pm$  SD of triplicate experiments. **C.** Cell viability quantification in CCRF-CEM T-ALL cells treated *in vitro* with vehicle only, BEZ235 (20-100 nM), CN585 (15  $\mu\text{M}$ ) or CN585 and BEZ235 (CN585 + BEZ235; 15  $\mu\text{M}$  and 20-100 nM, respectively). Error bars represent  $\pm$  SD of triplicate experiments. **(D, left panel)** Apoptosis quantification in T-ALL#12 cells treated *in vitro* with vehicle only, BEZ235 (2  $\mu\text{M}$ ), CN585 (10 or 20  $\mu\text{M}$ ) or BEZ235 plus CN585 (BEZ235 + CN585; 2  $\mu\text{M}$  and 10 or 20  $\mu\text{M}$ , respectively). Error bars represent  $\pm$  SD of triplicate experiments. **(D, middle panel)** Apoptosis quantification in T-ALL#9 cells treated *in vitro* with vehicle only, BEZ235 (2  $\mu\text{M}$ ), CN585 (20  $\mu\text{M}$ ) or BEZ235 plus CN585 (BEZ235 + CN585; 2  $\mu\text{M}$  and 20  $\mu\text{M}$ , respectively). Error bars represent  $\pm$  SD of triplicate experiments. **(D, right panel)** Apoptosis quantification in T-ALL#15 xenograft cells treated *in vitro* with vehicle only, CN585 (20  $\mu\text{M}$ ), BEZ235 (2  $\mu\text{M}$ ) or BEZ235 plus CN585 (BEZ235 + CN585; 2  $\mu\text{M}$  and 20  $\mu\text{M}$ , respectively). Error bars represent  $\pm$  SD of triplicate experiments. **E.** Apoptosis quantification in MOLT-3 T-ALL cells treated *in vitro* with vehicle only, FK-506 (20  $\mu\text{M}$ ), BEZ235 (50 nM) or BEZ235 plus FK-506 (BEZ235 + FK-506; 50 nM and 20  $\mu\text{M}$ , respectively). Error bars represent  $\pm$  SD of triplicate experiments.

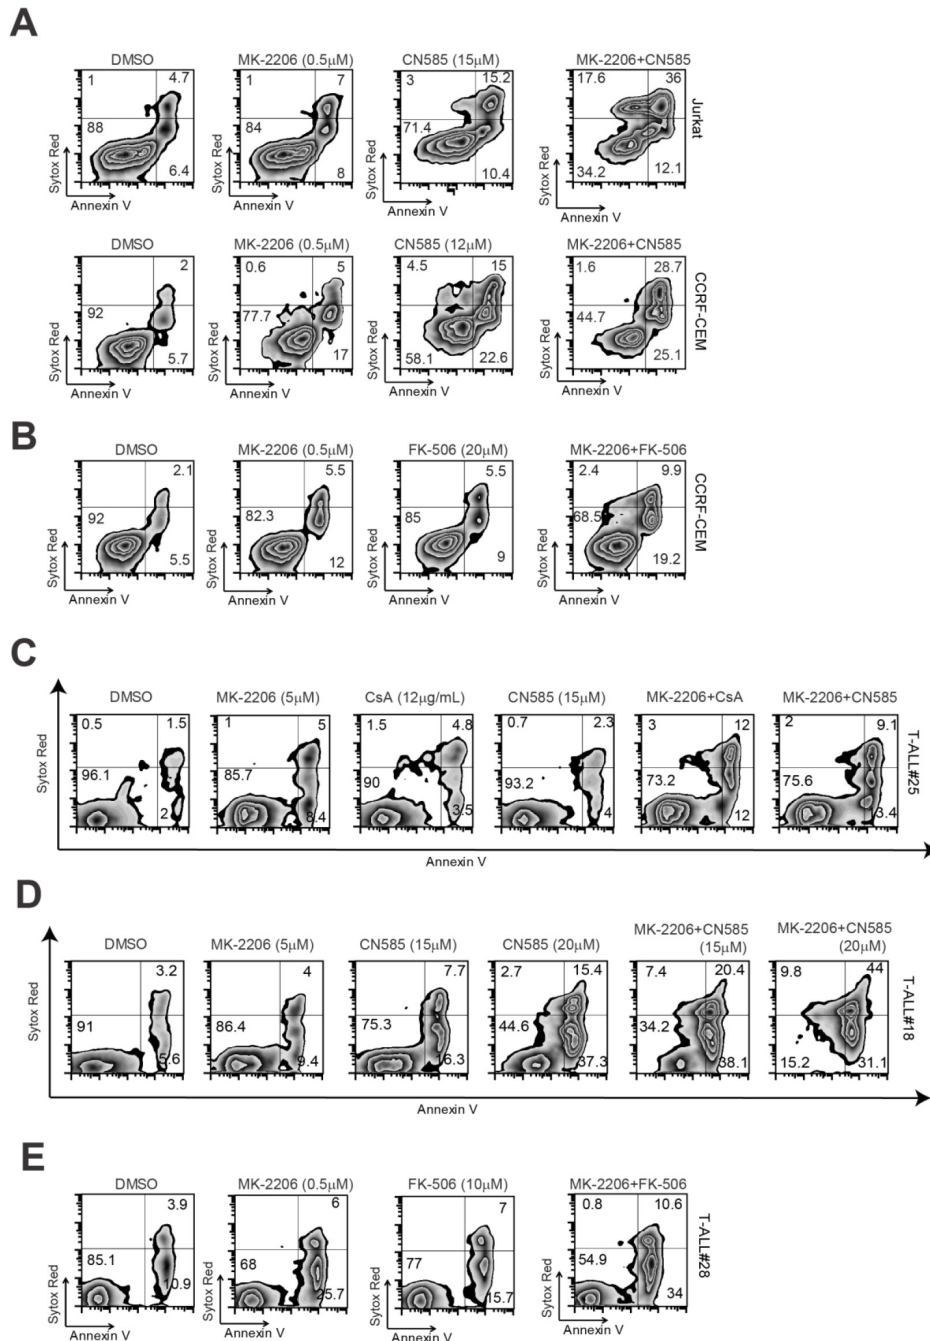

### Supplementary Figure S3: Pharmacologic inhibition of Cn and AKT induces a synergistic anti-leukemic effect.

(A, top panels) Representative plots of apoptosis in Jurkat T-ALL cells treated *in vitro* with vehicle only, MK-2206 (0.5  $\mu$ M), CN585 (15  $\mu$ M) or CN585 plus MK-2206 (CN585 + MK-2206; 15  $\mu$ M and 0.5  $\mu$ M, respectively). (A, bottom panels) Representative plots of apoptosis in CCRF-CEM T-ALL cells treated *in vitro* with vehicle only, MK-2206 (0.5  $\mu$ M), CN585 (12  $\mu$ M) or CN585 plus MK-2206 (CN585 + MK-2206; 12  $\mu$ M and 0.5 $\mu$ M, respectively). **B**. Representative plots of apoptosis in CCRF-CEM T-ALL cells treated *in vitro* with vehicle only, MK-2206 (0.5  $\mu$ M), FK-506 (20  $\mu$ M) or FK-506 plus MK-2206 (FK-506 + MK-2206; 20  $\mu$ M and 0.5 $\mu$ M, respectively). **C**. Representative plots of apoptosis in T-ALL#25 xenograft cells treated *in vitro* with vehicle only, MK-2206 (5  $\mu$ M), CsA (12  $\mu$ g/mL), CN585 (15  $\mu$ M) or MK-2206 plus CsA or CN585 (MK-2206 + CsA; 5  $\mu$ M and 12  $\mu$ g/mL or MK-2206 + CN585; 5  $\mu$ M and 15  $\mu$ M, respectively). **D**. Representative plots of apoptosis in T-ALL#18 xenograft cells treated *in vitro* with vehicle only, MK-2206 (5  $\mu$ M), CN585 (15 - 20  $\mu$ M) or MK-2206 plus CN585 (MK-2206 +CN585; 5  $\mu$ M and 15-20  $\mu$ M, respectively). **E**. Representative plots of apoptosis in T-ALL#28 xenograft cells treated *in vitro* with vehicle only, MK-2206 (0.5  $\mu$ M), FK506 (10  $\mu$ M) or MK-2206 plus FK506 (MK-2206 +FK506; 0.5  $\mu$ M and 10  $\mu$ M, respectively).

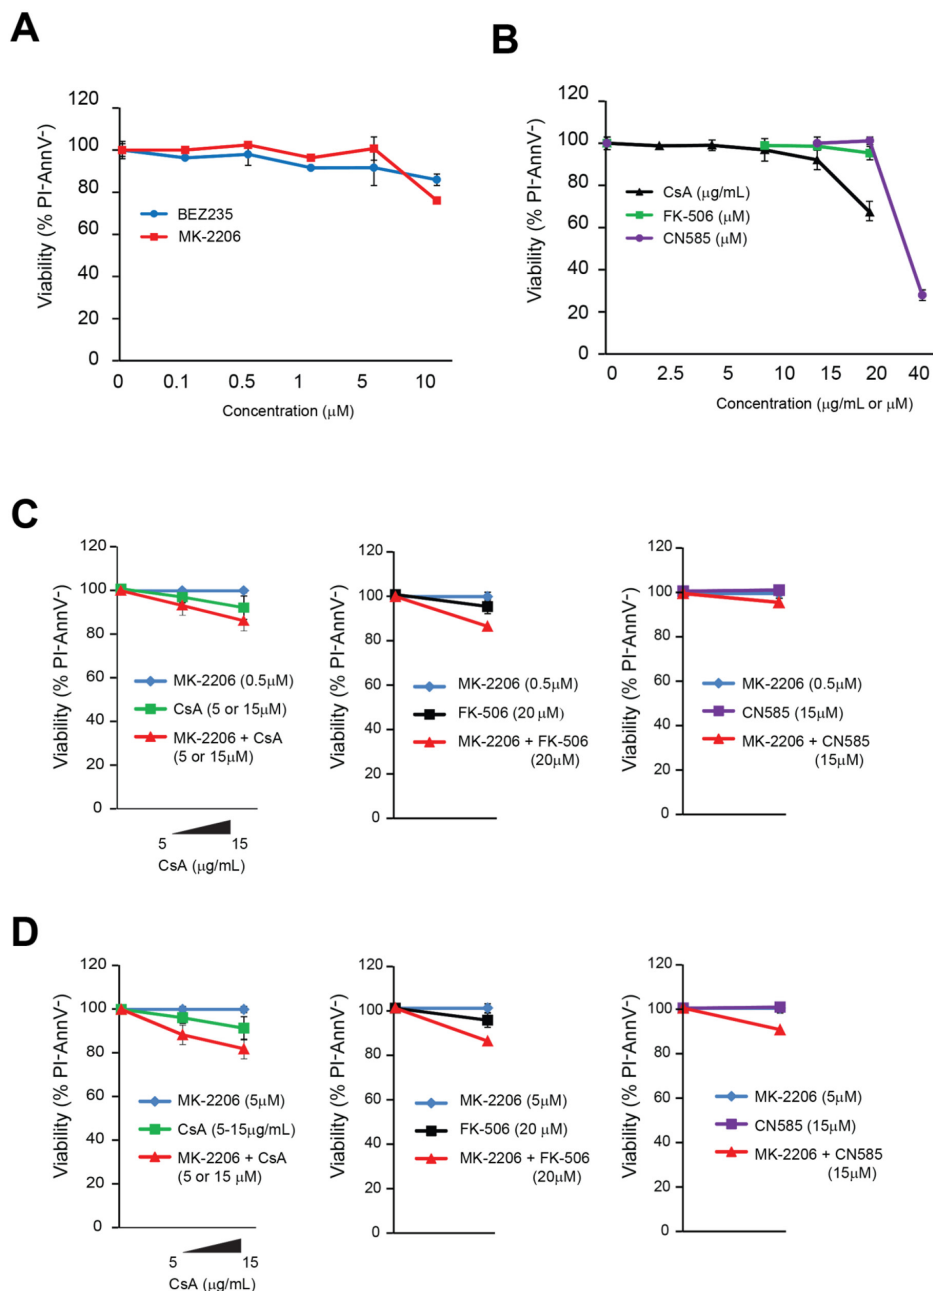

### Supplementary Figure S4: Effect of pharmacologic inhibition of PI3K/mTOR or AKT or Cn on PBMCs viability.

PBMCs were isolated by Ficoll density gradient, cultured in complete medium supplemented with anti-CD3 and IL-2 and exposed to different concentrations of BEZ235 and MK-2206 (panel A.) or to the Cn inhibitors (CsA or FK-506 or CN585; panel B.) for 48 hours and evaluated for viability by flow cytometry. Viability is expressed as percentage of viable cells (AnnexinVPI) compared to DMSO treated controls. C. PBMCs were cultured in complete medium supplemented with anti-CD3 and IL-2 and exposed to the AKT inhibitor MK-2206 (0.5  $\mu$ M) in combination with different concentrations of the Cn inhibitor (CsA 5 or 15  $\mu$ g/mL; left panel), FK-506 (20  $\mu$ M; middle panel) or CN585 (15  $\mu$ M; right panel) for 48 hours and evaluated for viability by flow cytometry. Viability is expressed as percentage of viable cells (AnnexinVPI) compared to DMSO treated controls. D. PBMCs were cultured in complete medium supplemented with anti-CD3 and IL-2 and exposed to the AKT inhibitor MK-2206 (5  $\mu$ M) in combination with different concentrations of the Cn inhibitor (CsA 5 or 15  $\mu$ g/mL; left panel), FK506 (20  $\mu$ M; middle panel) or CN585 (15  $\mu$ M; right panel) for 48 hours and evaluated for viability by flow cytometry. Viability is expressed as percentage of viable cells (AnnexinVPI) compared to DMSO treated controls. For these experiments 2-4 different donors were used.

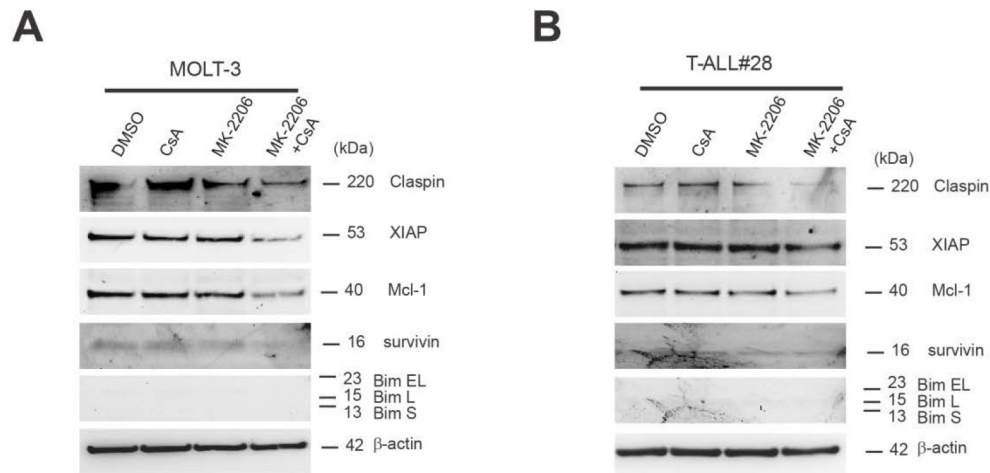

**Supplementary Figure S5: Down-regulation of Mcl-1, Claspin and X-linked inhibitor of apoptosis protein (XIAP) are associated with the anti-leukemic effect of joint inhibition of AKT and Cn.** **A.** Western blot analysis of Claspin, XIAP, survivin, Mcl-1 and Bim expression in MOLT-3 T-ALL cells treated for 24 h with vehicle only, MK-2206 (0.5  $\mu$ M), CsA (12  $\mu$ g/mL) or MK-2206 plus CsA (MK-2206 + CsA; 0.5  $\mu$ M and 12 $\mu$ g/mL, respectively).  $\beta$ -actin is shown as loading control. **B.** Western blot analysis of Claspin, XIAP, survivin, Mcl-1 and Bim expression in T-ALL#28 xenograft cells treated for 24 h with vehicle only, MK-2206 (0.5  $\mu$ M), CsA (5  $\mu$ g/mL) or MK-2206 plus CsA (MK-2206 + CsA; 0.5  $\mu$ M and 5  $\mu$ g/mL, respectively).  $\beta$ -actin is shown as loading control.

**Supplementary Table S1: List of PPP3CA-interacting proteins identified by mass spectrometry analysis.**

See Supplementary File 1

**Supplementary Table S2: List of canonical signaling pathways enriched in identified PPP3CA-interacting proteins.**

See Supplementary File 2
